# Supplementary material
Source: publisher figshare collection journal article supplement (https://acs.figshare.com/ndownloader/files/4516795)
Supplement: Supplementary file 1 [file 4516795]

**Supporting Information for:**

**A combined crystallographic and molecular dynamics study of  
cathepsin L retro-binding inhibitors**

Rajesh T. Shenoy<sup>1</sup> #, Shařinaz F. Chowdhury<sup>2</sup> #, S. Kumar<sup>1</sup>, Lissa Joseph<sup>1</sup>, Enrico O. Purisima<sup>2</sup> \*  
and J. Sivaraman<sup>1</sup> \*

<sup>1</sup>*Department of Biological Sciences, 14 Science Drive 4, National University of Singapore,  
Singapore 117543*

<sup>2</sup>*Biotechnology Research Institute, National Research Council Canada, 6100 Royalmount  
Avenue, Montreal, Quebec H4P 2R2, Canada*

# These authors contributed equally to the work.

\*Address correspondence to either Enrico O. Purisima (Enrico.Purisima@nrc.ca) or J.  
Sivaraman (dbsjayar@nus.edu.sg)

**Contents:**

Figure S1: Schematic view of cathepsin L–inhibitor interactions

Figures S2 and S3: Stereo view of superposition of an MD snapshot of inhibitors **4** and **9** versus  
their crystal structure binding modes

Figure S4: Left intentionally blank

Figure S5: Interatomic distance fluctuations between cathepsin L and inhibitor **4**

Figure S6: Interatomic distance fluctuations between cathepsin L and inhibitor **9**

Figure S7: Interatomic distance fluctuations between cathepsin L and inhibitor **14**

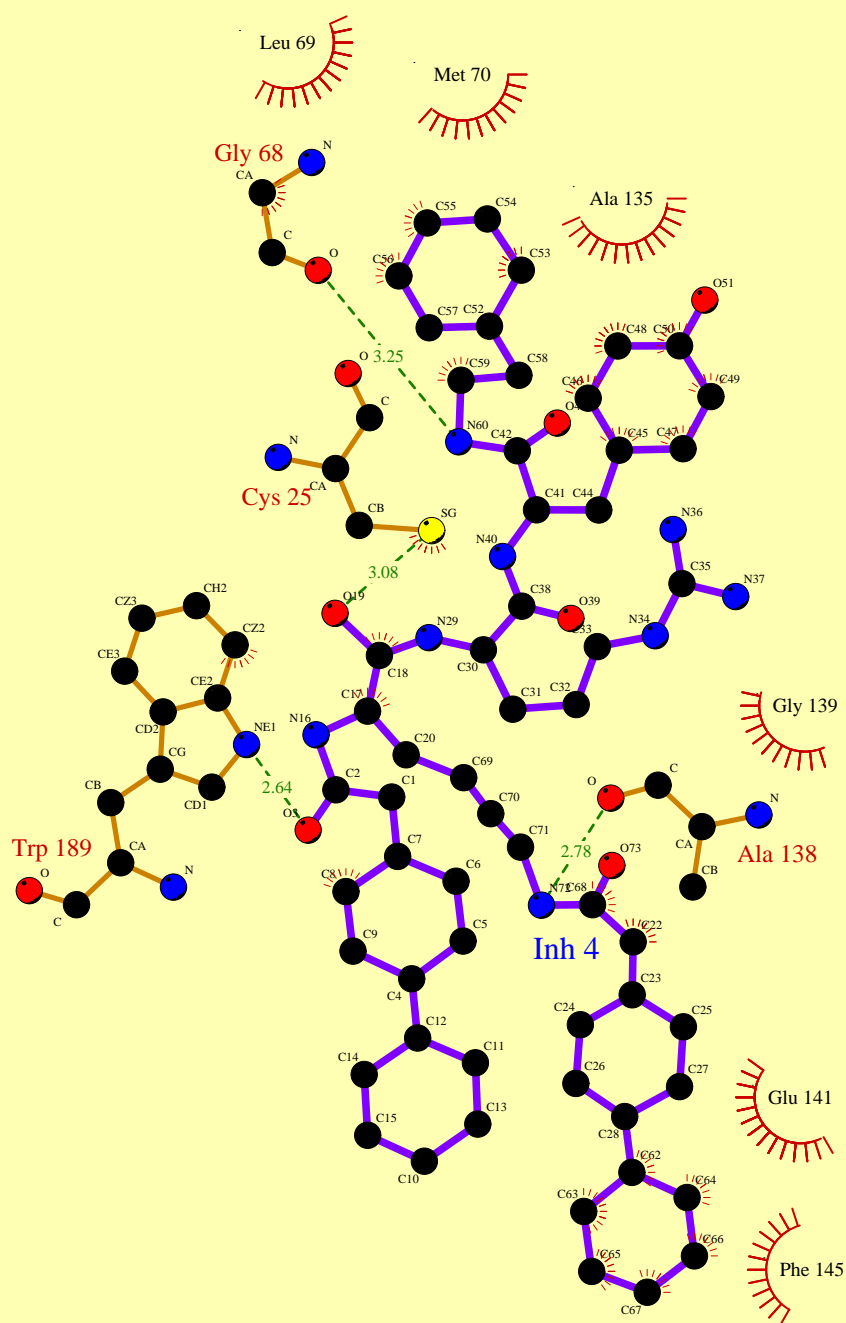

## Key

- — ● Ligand bond
- — ● Non-ligand bond
- --- ● 3.0 Hydrogen bond and its length
- His 53 Non-ligand residues involved in hydrophobic contact(s)
- Corresponding atoms involved in hydrophobic contact(s)

## Inhibitor 4

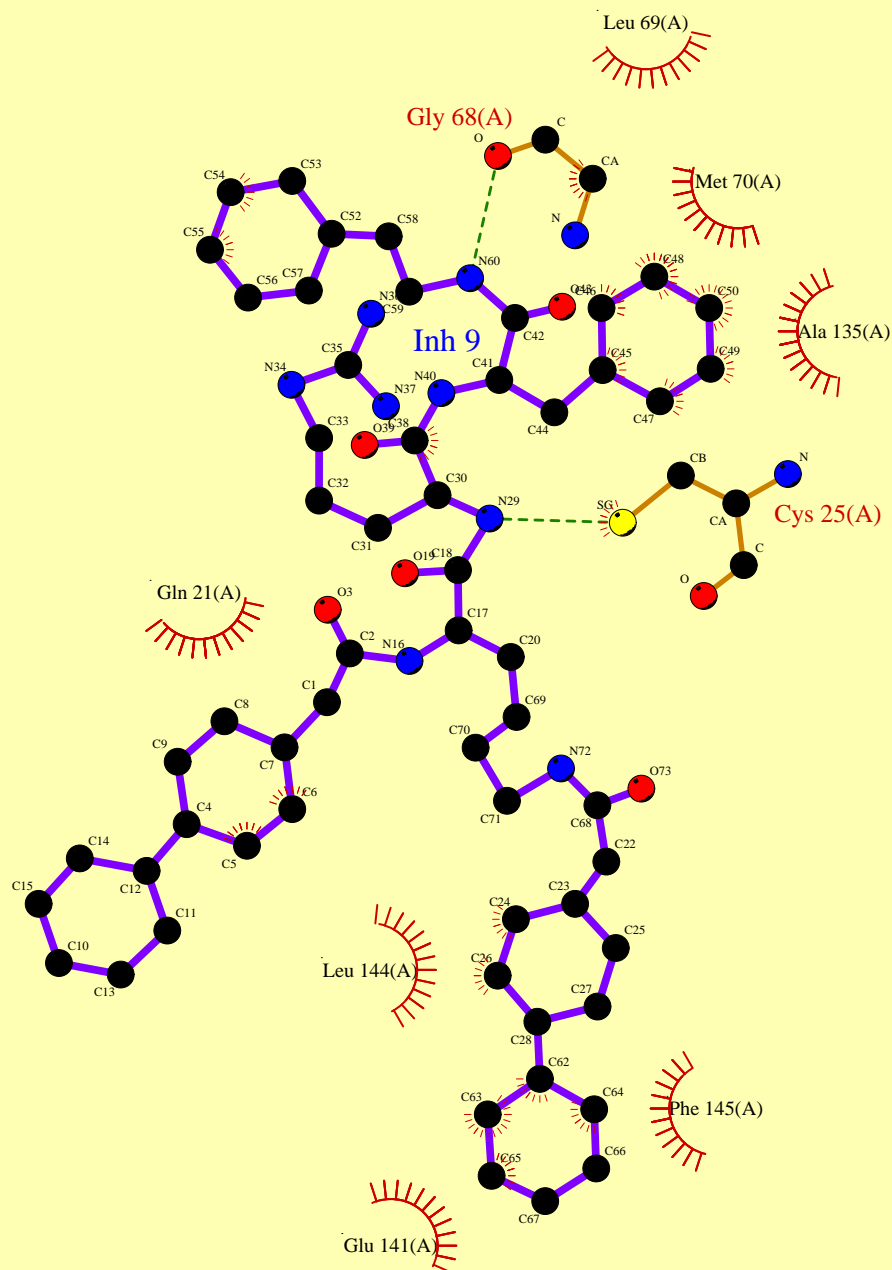

## Key

- Ligand bond
- Non-ligand bond
- Hydrogen bond

- His 53 Non-ligand residues involved in hydrophobic contact(s)
- Corresponding atoms involved in hydrophobic contact(s)

## Inhibitor 9



**Figure S1.** Schematic view of cathepsin L – inhibitor interactions for (a) cathepsin L with inhibitor **4**, (b) cathepsin L with inhibitor **9** and (c) cathepsin L with inhibitor **14**. Hydrogen bonds between cathepsin L and the inhibitors (less than or equal to 3.2 Å) are indicated by broken lines. These figures were prepared with the program LIGPLOT.<sup>1</sup>

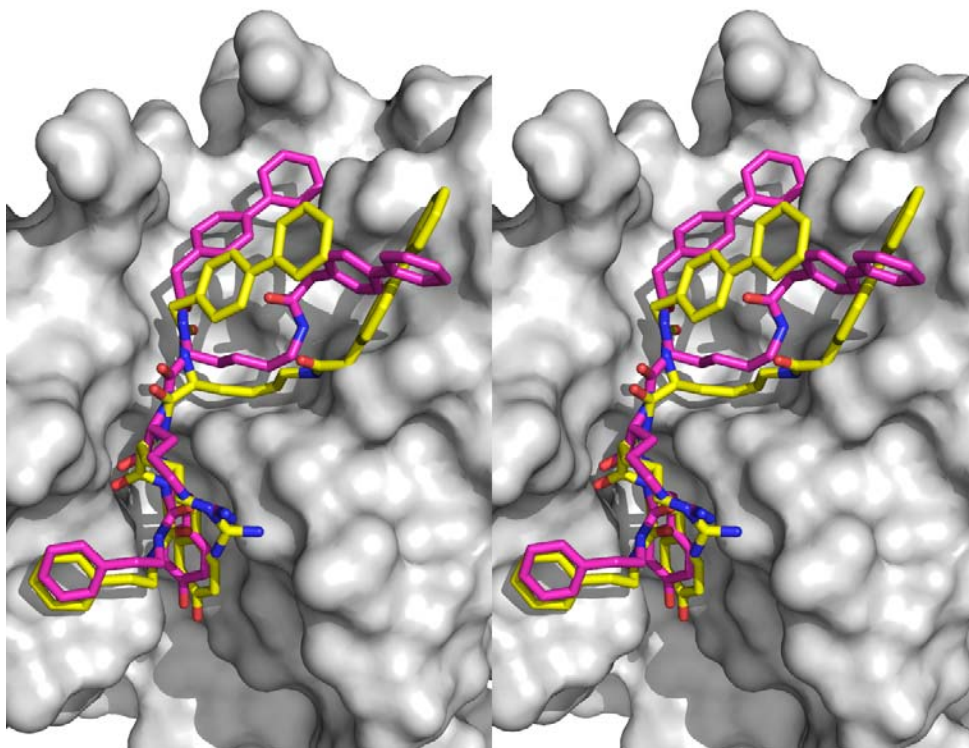

**Figure S2.** Stereo view of superposition of an MD snapshot of inhibitor **4** and the crystal structure binding mode. The magenta-colored carbon chains correspond to the MD snapshot.

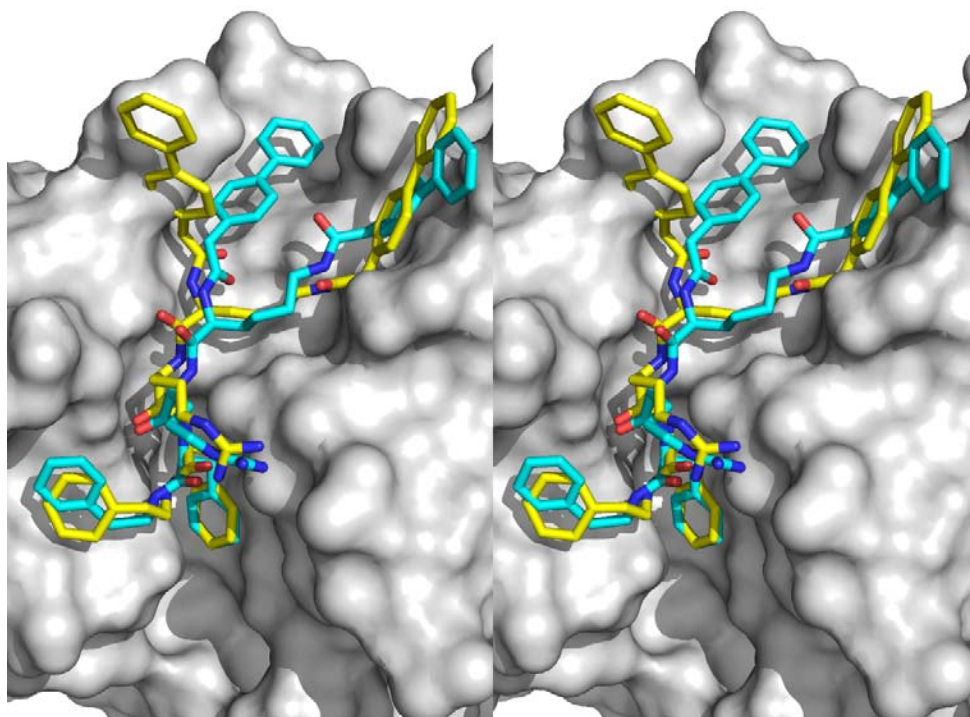

**Figure S3.** Stereo view of superposition of an MD snapshot of inhibitor **9** and the crystal structure binding mode. The cyan-colored carbon chains correspond to the MD snapshot.

**Figure S4.** Intentionally left blank.

Figures S5 to S7 below are based on a duplicate MD simulation carried out to verify the reproducibility of the results from the original MD run. They are the equivalent of Figures 5 to 7 in the main text.

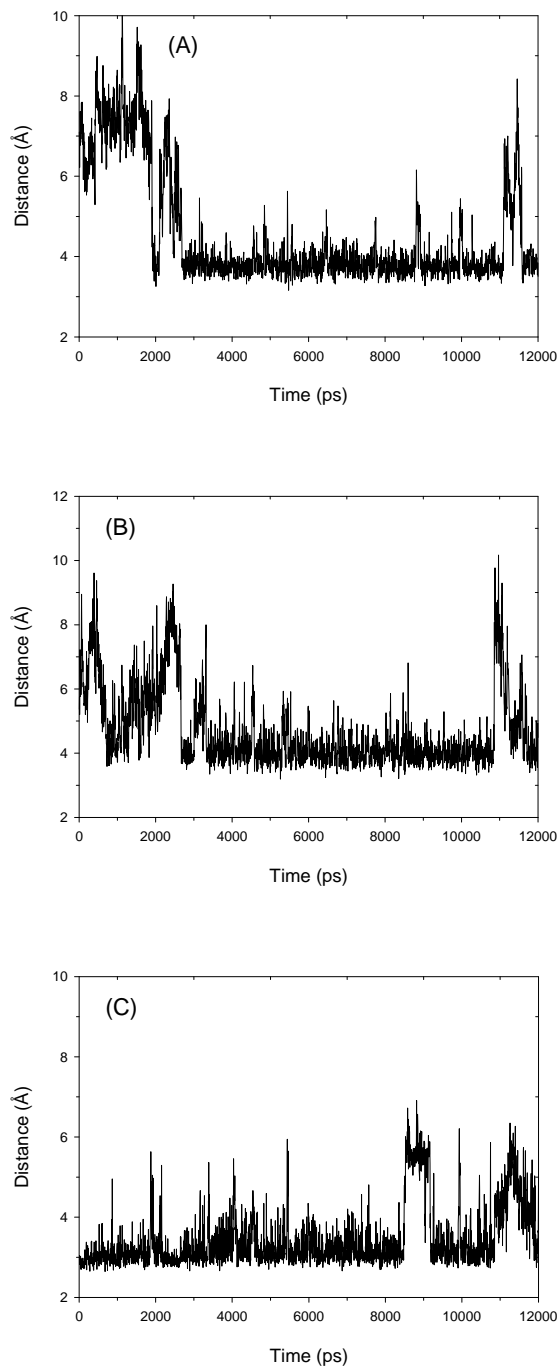

**Figure S5.** Interatomic distance fluctuations between cathepsin L and inhibitor **4**. (a) Trp184 CG – Inhibitor C4. This tracks the interaction of the backbone biphenyl with the Trp184 indole ring. (b) Leu144 CD2 – Inhibitor C28. This tracks the interaction of the side chain biphenyl with a nonpolar binding site represented by the Leu144 side chain. (c) Ala138 carbonyl O – Inhibitor Lys Nε. This tracks the locking of the inhibitor Lys side chain by formation of a hydrogen bond. See Figure S1a for atom numbering of inhibitor **4**. Together these distances provide an indication of the disposition and mobility of the biphenyl groups.



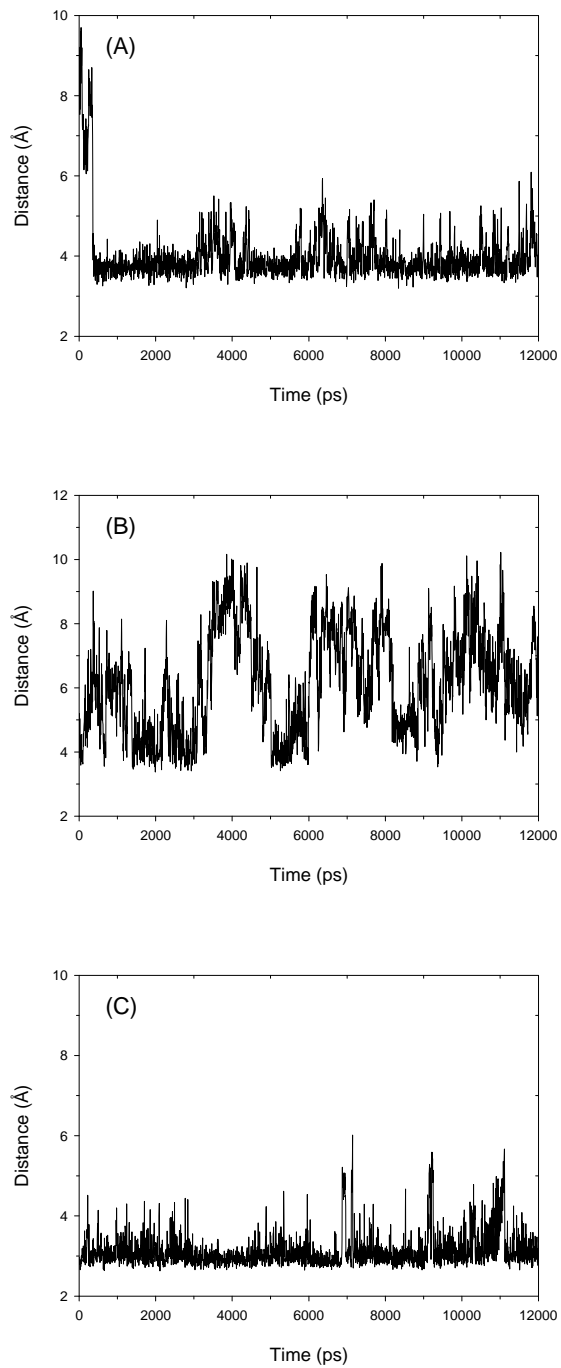

**Figure S6.** Interatomic distance fluctuations between cathepsin L and inhibitor **9**. (a) Trp184 CG – Inhibitor C4, (b) Leu144 CD2 – Inhibitor C28, (c) Ala138 carbonyl O – Inhibitor Lys Nε. See Figure S1b for atom numbering of inhibitor **4**. The significance of the various tracked distances is as in Figure S5.

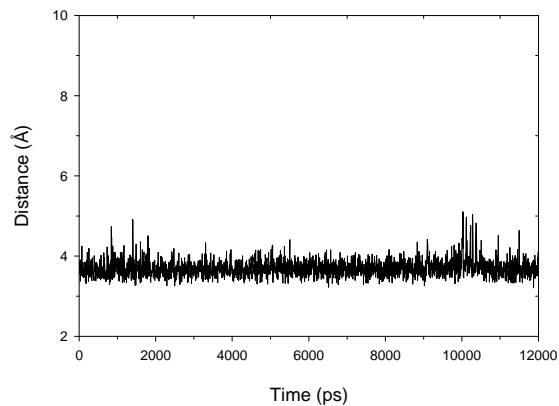

**Figure S7.** Interatomic distance fluctuations between cathepsin L and inhibitor **14**. Trp184 CG – Inhibitor C4. See Figure S1c for atom numbering of inhibitor **14**. This tracks the interaction of the backbone biphenyl with the Trp184 indole ring.

#### References

1. Wallace, A. C., Laskowski, R. A. & Thornton, J. M. (1995). LIGPLOT: a program to generate schematic diagrams of protein-ligand interactions. *Protein Eng.* **8**, 127-134.
